# Supplementary material for: SpvC is a Salmonella effector with phosphothreonine lyase activity on host mitogen-activated protein kinases
Source: PubMed Central journal article supplement (PMC2268955; doi:10.1111/j.1365-2958.2008.06134.x), 2008-03

## SUPPLEMENTARY MATERIAL

Table S1. Bacterial strains and plasmids used in this study

| Name                         | Description                                                                                                                                                | Reference                         |
|------------------------------|------------------------------------------------------------------------------------------------------------------------------------------------------------|-----------------------------------|
| <b>Strains</b>               |                                                                                                                                                            |                                   |
| S. Typhimurium               |                                                                                                                                                            |                                   |
| 12023s                       | Wild type                                                                                                                                                  | NTCC <sup>a</sup>                 |
| <i>ssaV</i>                  | Strain HH109 (12023s <i>ssaV::aphT</i> )                                                                                                                   | Deiwick <i>et al.</i> , (1998)    |
| <i>prgH</i>                  | Strain HH124 (12023s <i>prgH020::Tn5lacZY</i> )                                                                                                            | Beuzon <i>et al.</i> , (2001)     |
| <i>prgH ssaV</i>             | Strain HH193 (12023s <i>ssaV::aphT prgH020::Tn5lacZY</i> )                                                                                                 | Beuzon <i>et al.</i> , (2001)     |
| $\Delta spvC^{Kn}$           | 12023s $\Delta spvC::Kn^r$                                                                                                                                 | This study                        |
| $\Delta spvC$                | as $\Delta spvC^{Kn}$ , but with excised $Kn^r$ cassette ( $Kn^s$ )                                                                                        | This study                        |
| $\Delta spvC$ pspvC          | $\Delta spvC$ harboring pACYCspvC-2HA                                                                                                                      | This study                        |
| <i>spvC</i> -2HA             | 12023s <i>spvC</i> -2HA:: $Kn^r$                                                                                                                           | This study                        |
| <i>ssaV</i> $\Delta spvC$    | as HH109, $\Delta spvC::Cm^r$                                                                                                                              | This study                        |
| <i>prgH</i> $\Delta spvC$    | as HH124, $\Delta spvC::Cm^r$                                                                                                                              | This study                        |
| <i>ssaV</i> <i>spvC</i> -2HA | as HH109, <i>spvC</i> -2HA:: $Cm^r$                                                                                                                        | This study                        |
| <i>prgH</i> <i>spvC</i> -2HA | as HH124, <i>spvC</i> -2HA:: $Kn^r$                                                                                                                        | This study                        |
| <b>Plasmids</b>              |                                                                                                                                                            |                                   |
| pSU314                       | Rep <sub>R6K</sub> Ap <sup>r</sup> 2HA FRT Cm <sup>r</sup> FRT                                                                                             | Uzzau <i>et al.</i> , (2001)      |
| pSU315                       | Rep <sub>R6K</sub> Ap <sup>r</sup> 2HA FRT Kn <sup>r</sup> FRT                                                                                             | Uzzau <i>et al.</i> , (2001)      |
| pKD46                        | Rep <sub>pSC101</sub> <sup>ts</sup> Ap <sup>r</sup> p <sub>araBAD</sub> $\gamma$ $\beta$ exo                                                               | Datsenko and Wanner (2000)        |
| pCP20                        | FLP <sup>+</sup> $\lambda$ p <sub>R</sub> Rep <sup>ts</sup> Ap <sup>r</sup> Cm <sup>r</sup>                                                                | Cherepanov and Wackernagel (1995) |
| pACYC184                     | Rep <sub>p15A</sub> Cm <sup>r</sup> Tet <sup>r</sup> low copy number vector                                                                                | Chang and Cohen (1978)            |
| pspvC                        | pACYC184 with C-terminal, 2-HA-tagged <i>spvC</i> cloned into <i>EcoRV</i> and <i>Sall</i> sites, Cm <sup>r</sup>                                          | This study                        |
| pGEX4T2                      | Vector for expression of GST fusion proteins                                                                                                               | Amersham Biosciences              |
| pGEXspvC                     | pGEX4T2 with <i>spvC</i> cloned between <i>BamHI</i> and <i>EcoRI</i> sites                                                                                | This study                        |
| pET22b                       | Vector for expression of His-tagged proteins                                                                                                               | Novagen, Inc.                     |
| pETspvC-His                  | pET22b with <i>spvC</i> cloned between <i>NdeI</i> and <i>XhoI</i> sites, with C-terminal 6-His tag and thrombin cleavage site allowing removal of the tag | This study                        |

<sup>a</sup>NTCC, National Type Culture Collection

### References:

- Deiwick, J., Nikolaus, T., Shea, J.E., Gleeson, C., Holden, D.W. and Hensel, M. (1998) Mutations in *Salmonella* pathogenicity island 2 (SPI2) genes affecting transcription of SPI1 genes and resistance to antimicrobial agents. *J Bacteriol* **180**: 4775-4780.
- Beuzón, C.R., Unsworth, K.E. and Holden, D.W. (2001) In Vivo Genetic Analysis Indicates That PhoP-PhoQ and the *Salmonella* Pathogenicity Island 2 Type III Secretion System Contribute Independently to *Salmonella enterica* Serovar Typhimurium Virulence. *Infect Immun* **69**: 7254-7261.
- Uzzau, S., Figueroa-Bossi, N., Rubino, S., and Bossi, L. (2001) Epitope tagging of chromosomal genes in *Salmonella*. *Proc Natl Acad Sci USA* **98**: 15264-15269.
- Datsenko, K.A., and Wanner, B.L. (2000) One-step inactivation of chromosomal genes in *Escherichia coli* K-12 using PCR products. *Proc Natl Acad Sci USA* **97**: 6640-6645.
- Cherepanov, P.P., and Wackernagel, W. (1995) Gene disruption in *Escherichia coli*: TcR and KmR cassettes with the option of Fip-catalyzed excision of the antibiotic-resistance determinant. *Gene* **158**: 9-14.
- Chang, A.C., and Cohen, S.N. (1978) Construction and characterization of amplifiable multicopy DNA cloning vehicles derived from the P15A cryptic miniplasmid. *J. Bacteriol.* **134**: 1141-1156.

Table S2. Primers

| <b>Primer</b>            | <b>Sequence (5'-3')</b>                                                                     | <b>Description</b>                                                                                                                                                                  |
|--------------------------|---------------------------------------------------------------------------------------------|-------------------------------------------------------------------------------------------------------------------------------------------------------------------------------------|
| spvC-F                   | GGCTTTACGTGAGGAACCGTTTTATCGTTTGATGACAGAGT<br>ATCCGTATGATGTGCCGGACTATGCGTATCCGTATGATGTT      | For 2HA tagging of SpvC on the virulence plasmid by insertion of Cm <sup>r</sup> or Km <sup>r</sup> cassette amplified from pSU314 or pSU315, respectively, upstream of <i>spvC</i> |
| spvC-R                   | CCTGATTATGCTAGCCTCTAGTAA<br>CGCTCTTGCTTATGTAATTTTACCATTACAGTGCGGACCA<br>TATGAATATCCTCCTTAGT |                                                                                                                                                                                     |
| pacycF<br>pacycR2HA-C    | GGGGGATATCTAA GGAGATTTCCCATGCCC<br>CGCCCGTCGAC TTAGTAGAGGCTAGCATAATC                        | For cloning <i>spvC-2HA</i> from the virulence plasmid into pACYC184 with an C-terminal 2HA-tag using <i>EcoRV</i> and <i>Sall</i> sites                                            |
| Del spvC-F               | GGCGATATATCCATATCGCAAAGGAGATTTCCCATGCCTAT<br>CCGTATGATGTTCCCTGAT                            | Primers to amplify Cm <sup>r</sup> or Km <sup>r</sup> cassette from pSU314 or pSU315, respectively, for making deletion of <i>spvC</i>                                              |
| Del spvC-R               | AACGGCGTTTACTGTTCCGTTGCTCCCCAAACCCATACCAT<br>ATGAATATCCTCCTTAG                              |                                                                                                                                                                                     |
| Del-F<br>Del-R           | GAGAATTTATATCTAATAATATG<br>GCATTTAAAATAGCTGTTTAAC                                           | Primers for confirmation of <i>spvC</i> deletion                                                                                                                                    |
| pGEXspvC-F<br>pGEXspvC-R | CGCCGGAT CC ATGCCATAAATAGGCC<br>CGCGCGAATTCTTAC TA CTCTGTCATCAAACGATAAA                     | For cloning <i>spvC</i> into pGEX4T2 with a N-terminal GST                                                                                                                          |
| spvC-His-F<br>spvC-His-R | GCGCGACATATGCCATAAATAGGCCTAATC<br>GCGTGCTCGAGGCTGCCGCGCGCACCCAGCTCTGTCATC<br>AAACGATAAAACGG | For cloning <i>spvC</i> into pET22b with a C-terminal 6-His tag and thrombin cleavage site                                                                                          |

Figure S1. SDS-PAGE and Coomassie Blue staining of purified GST-SpvC (left lane) and GST (right lane) used in *in vitro* assays in this work. Middle lane contains molecular size markers (BioRad).

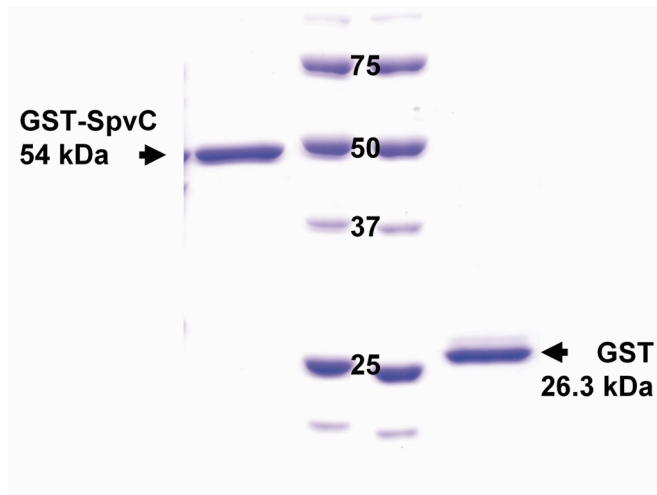

Supplement: mmi0067-1371-SD1.pdf [file mmi0067-1371-SD1.pdf]
